1 **Quantifying the contribution of four resistance mechanisms to**  
2 **ciprofloxacin minimum inhibitory concentration in *Escherichia coli*: a**  
3 **systematic review**

4

5 **Authors**

6 Boas C.L. van der Putten(1)(2)\*

7 Daniel Remondini(3)

8 Giovanni Pasquini(3)

9 Victoria A. Janes(2)

10 Sébastien Matamoros(2)

11 Constance Schultsz(1)(2)

12

13 (1) Amsterdam UMC, University of Amsterdam, Department of Global Health, Amsterdam

14 Institute for Global Health and Development, Meibergdreef 9, Amsterdam, Netherlands

15 (2) Amsterdam UMC, University of Amsterdam, Department of Medical Microbiology,

16 Meibergdreef 9, Amsterdam, Netherlands

17 (3) Department of Physics and Astronomy (DIFA), University of Bologna, Viale Berti Pichat

18 6/2, 40127 Bologna, Bologna, Italy.

19

20 **\*Corresponding author. Telephone (+31)20 56 64860, E-mail**

21 **[boas.vanderputten@amc.uva.nl](mailto:boas.vanderputten@amc.uva.nl)**

22 Running title: A systematic review of genetic determinants of ciprofloxacin MIC in *Escherichia*

23 *coli*

24

25

## 26 **Synopsis**

### 27 **Introduction**

28 Ciprofloxacin resistance in *Escherichia coli* is widespread and adds to the burden of *E.*  
29 *coli* infections. Reviews assessing the genetic basis of ciprofloxacin resistance have mostly been  
30 qualitative. However, to allow for the prediction of a resistance phenotype of clinical relevance  
31 based on genotypic characteristics, it is essential to quantify the contribution of prevalent  
32 genotypic determinants to resistance. We carried out a systematic review to assess the relative  
33 contribution of currently known genomic resistance determinants to the minimum inhibitory  
34 concentration (MIC) of ciprofloxacin in *E. coli*.

### 35 **Methods**

36 PubMed and Web of Science were searched for English language studies that assessed both  
37 ciprofloxacin MIC and the presence or introduction of genetic determinants of ciprofloxacin  
38 resistance in *E. coli*. We included experimental and observational studies without time  
39 restrictions. Medians and ranges of MIC fold changes were calculated for each resistance  
40 determinant and for combinations of determinants.

### 41 **Results**

42 We included 66 studies, describing 604 *E. coli* isolates that carried at least one genetic  
43 resistance determinant. Genes coding for targets of ciprofloxacin (*gyrA* and *parC*) are strongest  
44 contributors to ciprofloxacin resistance, with median MIC fold increases ranging from 24 (range  
45 4-133) for single Ser83Leu (*gyrA*) mutants to 1533 (range 256-8533) for triple Ser83Leu,  
46 Asp87Asn/Gly (*gyrA*) and Ser80Ile/Arg (*parC*) mutants. Other resistance mechanisms, including  
47 efflux, physical blocking or enzymatic modification, conferred smaller increases in ciprofloxacin  
48 MIC (median MIC fold increases typically around 15, range 1-125). However, the (combined)  
49 presence of these other resistance mechanisms further increases resistance with median MIC  
50 fold increases of up to 4000, and even in the absence of *gyrA* and *parC* mutations up to 250.

## 51 **Conclusion**

52 This report provides a comprehensive and quantitative overview of the contribution of different  
53 genomic determinants to ciprofloxacin resistance in *E. coli*. Additionally, the data demonstrate  
54 the complexity of resistance phenotype prediction from genomic data and could serve as a  
55 reference point for studies aiming to address ciprofloxacin resistance prediction using genomics,  
56 in *E. coli*.

57

## 58 **Introduction**

59 *Escherichia coli* is a Gram-negative bacterium able to adopt a commensal or pathogenic lifestyle  
60 in humans and animals.<sup>1</sup> Adding to the danger of pathogenic *E. coli* is the rise of antimicrobial  
61 resistance. *Escherichia coli* has acquired resistance to some of our most important  
62 antimicrobials, including aminopenicillins, cephalosporins, aminoglycosides, carbapenems and  
63 fluoroquinolones.<sup>2</sup>

64 Ciprofloxacin is an antimicrobial of the fluoroquinolone class, commonly prescribed for a wide  
65 variety of infections including infections caused by *E. coli*.<sup>3</sup> As is the case for other  
66 fluoroquinolones, the substrate of ciprofloxacin is the complex formed by the DNA of the  
67 bacterium and either the DNA gyrase enzyme or the topoisomerase IV enzyme.<sup>4-6</sup> DNA gyrase  
68 creates single-stranded breaks in the DNA to negatively supercoil the DNA during replication or  
69 transcription.<sup>7</sup> If ciprofloxacin binds DNA gyrase in complex with DNA, the single stranded DNA  
70 breaks cannot be religated and thus accumulate, leading to double stranded DNA breaks.<sup>8</sup> A  
71 similar mechanism is hypothesized for topoisomerase IV.<sup>9</sup>

72 The mechanisms of ciprofloxacin resistance in *E. coli* have been investigated intensively in the  
73 past 30 years. Mutations in genes coding for DNA gyrase and topoisomerase IV contribute to  
74 ciprofloxacin resistance in *E. coli*.<sup>10,11</sup> In addition, efflux pumps may decrease drug accumulation

75 whilst peptides and enzymes may block drug targets or may modify the drug, respectively  
76 (Figure 1). Numerous reviews have covered the topic of ciprofloxacin resistance in *E. coli*, but  
77 these reviews have been overwhelmingly qualitative in nature.<sup>12–19</sup>

78 With the rapidly increasing availability of next generation sequencing technologies, research  
79 aimed at the prediction of a resistance phenotype from genomic data is increasing. However,  
80 these efforts typically correlate genotypic data to a categorical measure of resistance, while a  
81 quantitative resistance phenotype prediction is of clinical relevance. Therefore, we carried out a  
82 systematic review, summarizing observational and experimental studies that assessed genetic  
83 ciprofloxacin resistance determinants and the ciprofloxacin minimum inhibitory concentration  
84 (MIC) conferred by these determinants in *E. coli*, to elucidate how the presence of genomic  
85 resistance determinants, either alone or in combination, affects ciprofloxacin MIC in *E. coli*. In  
86 addition, we performed an *E. coli* protein network analysis to detect potential additional  
87 determinants of ciprofloxacin resistance on the basis of the findings of the systematic review.

88

## 89 **Methods**

### 90 **Systematic search**

91 The PRISMA 2009 checklist was used as a guide for this systematic review.<sup>20</sup> PubMed and Web  
92 of Science were searched using a defined set of keywords, selecting original research articles in  
93 English language reporting on susceptibility test results of *Escherichia coli* isolates measured as  
94 Minimum Inhibitory Concentration (MIC) due to genetic modifications identified in clinical,  
95 carriage or environmental isolates (observational) or introduced in *E. coli* strains *in vitro*  
96 (experimental) (Supplementary methods). No time limits were applied. In addition to the defined

97 search strategy, forward and backward citation searches of reviews and included articles was  
98 carried out. The final search was conducted on July 5<sup>th</sup>, 2018.

## 99 **Inclusion and exclusion criteria for experimental and observational studies**

100 Articles were not considered eligible for inclusion if they failed to mention any keyword (listed in  
101 the supplementary methods) describing ciprofloxacin resistance determinants in title or abstract.  
102 Eligible articles were screened by title, abstract and/or full text for inclusion based on the  
103 following inclusion and exclusion criteria (Figure 2). Studies could be included as experimental  
104 or as observational studies. For inclusion as an experimental study, the study needed to report a  
105 ciprofloxacin MIC before and after the introduction of a genetic modification in a single  
106 *Escherichia coli* strain. Studies were eligible to be included as observational studies if the  
107 ciprofloxacin MIC of at least one *Escherichia coli* isolate was reported, together with the  
108 observed genetic determinants of ciprofloxacin resistance. *In vitro* evolution studies where *E. coli*  
109 were exposed to ciprofloxacin resulting in decreased susceptibility to ciprofloxacin, were  
110 considered observational studies, since mutations are not actively introduced in these studies.  
111 Observational studies were excluded if they failed to test for the presence of all of the following  
112 resistance determinants: mutations in Ser83 and Asp87 of *gyrA*, mutations in Ser80 and Glu84  
113 of *parC*, mutations in *acrR* and *marR*, presence of *oqxAB*, *qepA*, *qnrA*, *qnrB*, *qnrS* and *aac(6')Ib-*  
114 *cr*. If studies failed to indicate unambiguously which resistance determinants were tested, the  
115 study was excluded.

## 116 **Definitions**

117 For this systematic review, the conventional definition of MIC was used, meaning the lowest  
118 concentration of ciprofloxacin that inhibits the visible growth of a bacterial culture during  
119 overnight incubation.<sup>21</sup> Clinical breakpoints ( $\leq 0.25$  mg/L susceptible; 0.5 mg/L intermediately

120 resistant,  $\geq 1$  mg/L resistant) and epidemiological cutoffs (0.064 mg/L) were used as defined by  
121 EUCAST.<sup>22,23</sup>

122 A genomic resistance determinant was defined as a mutation in a gene or the presence of a  
123 plasmid-mediated gene that decreases ciprofloxacin susceptibility. Since currently four  
124 mechanisms of ciprofloxacin resistance in *E. coli* are known, an isolate can possess multiple  
125 resistance determinants encoding for multiple resistance mechanisms. In addition, a single  
126 resistance mechanism can be encoded by multiple resistance determinants.

127 Genetic modifications were defined as an experimentally acquired mutation, insertion or deletion  
128 of a nucleotide or a sequence of nucleotides in the chromosome. The introduction of plasmid-  
129 mediated genes was also considered a genetic modification. Dominance tests as described by  
130 Heisig *et al.* were considered experimental evidence.<sup>24</sup> In short, a dominance test relies on  
131 increasing the susceptibility of a bacterium to an antimicrobial, by introducing a plasmid  
132 containing the wild type gene that codes for the antimicrobial's target. In the studies included in  
133 this report, the MICs of bacteria with mutations in *gyrA* or *parC* were lowered by introducing a  
134 plasmid containing wild type *gyrA* or wild type *parC*.

### 135 **Data extraction and analysis**

136 The management of the literature search was performed using Pubreminer  
137 (<http://hgserver2.amc.nl/cgi-bin/miner/miner2.cgi>).

138 All data on genetic modifications were extracted from the articles or supplementary material,  
139 together with MIC data. For experimental data, the MICs of the isolates before and after a  
140 targeted genetic modification were extracted to calculate a fold change of ciprofloxacin MIC for  
141 each of the *E. coli* isolates.

142 We calculated how frequently resistance determinants were tested in the experimental data.  
143 This frequency is expressed as the number of isolates in which the genetic modification was  
144 introduced, divided by the total number of isolates included from experimental studies. The  
145 frequency can be used to estimate the strength of evidence per resistance determinant (Table  
146 S1). Furthermore, the sample sources, country of origin and isolation date of included *E. coli*  
147 isolates were extracted from the observational studies.  
148 The MIC fold change data plot and the correlation matrix were generated using the ggplot2  
149 package RStudio version 1.1.383, running R version 3.4.2. Pearson correlation coefficients were  
150 calculated using the stats package and prepared for plotting using the reshape2 package.

## 151 **Network construction**

152 To investigate interactions between resistance determinants and to search for potential  
153 resistance determinants, a protein-protein interaction network was constructed. The *Escherichia*  
154 *coli* K-12 MG1655 interactome was extracted from the STRING-v10 database.<sup>25</sup> String-v10 aims  
155 to be more complete in terms of coverage of proteins for each organism in comparison to the  
156 other meta-interactomes available.<sup>26,27</sup> The functional association is the basic interaction unit of  
157 String in order to link proteins with a functional relation that are likely to contribute to a common  
158 biological purpose. Each interaction is derived from multiple sources, and we identify three  
159 groups of interactions (Table S3): PI interactions (where at least one physical protein interaction  
160 has been tested, imported from primary databases), FP interactions (determined by at least one  
161 functional prediction of an algorithm employed by String, genomic information, pathway  
162 knowledge, orthology relations) and TM interactions (supported only by automated text-mining of  
163 MedLine abstracts and full-text articles). Based on the sources, for each interaction in String a  
164 score is calculated, ranging from 0 to 1. In our analysis, only interactions with a score higher  
165 than 0.7 were retained (defined as high quality interactions by String), resulting in 3,890 nodes  
166 and 32,854 edges (with only 0.06% of the links supported only by TM interactions). Genes

167 resulted by the systematic search were mapped to the EcoGene-3.0 database to obtain *E. coli*  
168 K-12 MG1655 identifiers (bnumber)<sup>28</sup>, that were subsequently mapped to the MG1655  
169 interactome.

170

## 171 **Results**

### 172 **Systematic search**

173 The systematic search yielded 5055 PubMed entries and 5873 Web of Science entries. After  
174 removal of duplicates, 1718 unique articles were screened on content by title, abstract and, if  
175 necessary, full text. This approach identified 50 articles that were included as experimental  
176 studies. Additionally, 10 experimental studies were identified through backward/forward  
177 searches in citations of included articles and known reviews. Three articles fulfilled inclusion  
178 criteria for observational studies, of which two articles were also included as experimental  
179 studies because they provided experimental data as well (figure 2).

180

181 The number of *E. coli* isolates which were confirmed to harbour at least one resistance  
182 determinant and for which MICs were reported, amounted to a total of 366 isolates from  
183 experimental studies (Table S1) and 238 isolates from observational studies (Table S2). A total  
184 of 43 different genomic determinants were described in the collected experimental data, of which  
185 21 were shown to have an effect on ciprofloxacin MIC (Table 1).



186 Experimental studies focused primarily on mutations in Ser83 (28% of included isolates) and  
187 Asp87 (18%) of *gyrA*, S80 (15%) of *parC* and mutations in *marR* (20%). Of all plasmid-mediated  
188 resistance genes, *qnrA* (17%), *qnrS* (12%) and *aac(6')Ib-cr* (13%) were described most often.  
189 The other resistance determinants were tested in less than 10% of the experimentally modified  
190 isolates.

191

### 192 **Target alteration mutations in *gyrA*, *gyrB*, *parC* and *parE***

193 Mutations in *gyrA* were the first ciprofloxacin resistance determinants to be discovered (Hooper  
194 1987). Mutations in *parC*, *gyrB* and *parE* were later also proven or implied to decrease  
195 ciprofloxacin susceptibility.<sup>11,29,44</sup> *gyrA* and *parC* mutations that reduce ciprofloxacin susceptibility  
196 cluster in regions termed the quinolone resistance-determining regions (QRDRs). Generally, the  
197 QRDR of *gyrA* ranges from amino acid Ala67 to Gln106,<sup>45</sup> and the QRDR of *parC* from Ala64 to  
198 Gln103.<sup>11</sup> *gyrA* and *parC* mutations accumulate stepwise in *E. coli* when exposed to  
199 ciprofloxacin, increasing ciprofloxacin MIC concurrently.<sup>11,46-48</sup> The most common initial mutation  
200 is Ser83Leu in *gyrA*.<sup>46-48</sup> In the collected experimental data, this mutation confers a median fold  
201 increase in MIC of 24 (range: 4-133x fold increase).<sup>11,49-55</sup> This mutation is most often followed  
202 by Ser80Ile in *parC*<sup>11,46,48</sup> and finally by Asp87Asn or Asp87Gly in *gyrA*.<sup>46-48</sup> As mutations in *gyrA*  
203 and *parC* accumulate, ciprofloxacin MIC increases steeply. The ciprofloxacin MIC fold increase  
204 for a mutant of Ser83Leu (*gyrA*) and Ser80Ile (*parC*) is 62.5.<sup>51</sup> A similar double mutant of  
205 Ser83Leu (*gyrA*) and Ser80Arg (*parC*) showed a ciprofloxacin MIC fold increase of 125.<sup>53</sup> For a  
206 triple mutant of Ser83Leu, Asp87Asn (*gyrA*) and Ser80Ile (*parC*) the median ciprofloxacin MIC  
207 fold increase is 2000.<sup>11,51,54</sup> A quadruple mutant of Ser83Leu, Asp87Asn (*gyrA*) and Ser80Ile,  
208 Glu84Lys (*parC*) has been tested, but this mutant did not show a higher ciprofloxacin MIC than  
209 triple mutants within the same study.<sup>11</sup> In addition, Gly81Asp and Asp82Gly mutations in *gyrA*

210 have been tested. These mutations caused low to no decrease in ciprofloxacin susceptibility  
211 (MIC fold changes: 2.6x and 1x, respectively, Table 2).<sup>49,56</sup>

212 Only one *gyrB* mutation (Asp426Asn) was shown to slightly increase ciprofloxacin resistance  
213 (Table 2).<sup>29</sup> We did not find studies that showed a decreased ciprofloxacin susceptibility due to  
214 mutations in *parE*. However, a Leu445His mutation in *parE* of *E. coli* caused a 2x fold increase  
215 in the MIC of norfloxacin, another fluoroquinolone.<sup>44</sup>

### 216 **Efflux pump genes (*acrAB*, *tolC*) and their transcriptional regulators (*marR*, *acrR* and** 217 ***soxS*)**

218 As with many other antimicrobials, bacterial efflux pumps also play a role in resistance against  
219 ciprofloxacin. Deletion of *acrAB* or *tolC* confers a clear increase in the ciprofloxacin susceptibility  
220 of *E. coli* (4-8 fold decrease in MIC).<sup>30,31,57</sup> Deletions of 14 other genes or operons coding for  
221 efflux pumps in *E. coli* did not affect the ciprofloxacin MIC.<sup>31</sup> The deletion of transcriptional  
222 repressors of expression of efflux pumps like *marR* and *acrR* has been shown to affect  
223 ciprofloxacin MIC. The only study in our collected experimental data to investigate deletion of  
224 *acrR* showed that the MIC tripled after the repressor was deleted.<sup>51</sup> Nine studies investigated the  
225 effects of *marR* deletion or mutation, which reported a median fold increase in ciprofloxacin MIC  
226 of 4 (range 1.5-218x fold increase).<sup>30,51,52,54,58-60</sup> A recent study by Pietsch *et al.* detected  
227 mutations in *rpoB* in an *in vitro* evolution experiment.<sup>33</sup> These mutations arose after  
228 accumulation of other mutations, and were shown to increase the ciprofloxacin MIC of a wild  
229 type *E. coli* by 1.5-3 fold change (Table 2). The mutations in *rpoB* were shown to increase  
230 ciprofloxacin MIC by upregulating the expression of *mdtK* (also known as *ydhE*).

231 Two experimental studies reported mutations in efflux pump operons, influencing ciprofloxacin  
232 MIC. The first mutation was Ala12Ser in *soxS*, leading to higher expression of *acrB*, in turn  
233 leading to a ciprofloxacin MIC fold increase of 4.<sup>32</sup> The second mutation was a Gly288Asp

234 mutation in *acrB* itself, conferring a 16.7 fold increase in ciprofloxacin MIC (Table 2).<sup>61</sup> This *acrB*  
235 mutation however increased susceptibility to other antimicrobials.

### 236 **Plasmid-encoded efflux pump genes *oqxAB* and *qepA***

237 In addition to chromosomally-encoded efflux pumps, the presence of plasmid-encoded efflux  
238 pump genes *oqxAB* and *qepA* has been shown to increase ciprofloxacin MIC in *E. coli*.<sup>34,35</sup>  
239 *oqxAB* confers a median fold increase in MIC of 7.5 (range 2-16x fold increase)<sup>35,62-64</sup>, while  
240 *qepA* confers a median fold increase of 4.5 (range 2-31x fold increase, Table 2).<sup>34,52,65-68</sup>

### 241 ***qnr* genes**

242 *qnrA* was the first plasmid-mediated quinolone resistance (PMQR) determinant to be  
243 discovered.<sup>36</sup> Qnr proteins are pentapeptide repeat proteins that decrease binding of  
244 fluoroquinolones to DNA gyrase by binding the DNA:DNA gyrase complex.<sup>69</sup> Since 2002, many  
245 more *qnr* alleles have been discovered. Currently seven families of *qnr* genes are recognized:  
246 *qnrA*, *qnrB*, *qnrC*, *qnrD*, *qnrE*, *qnrS* and *qnrVC*.<sup>70</sup> In the collected experimental data, all *qnr*  
247 families have been tested for their influence on ciprofloxacin MIC of *E. coli*, except for *qnrVC*.  
248 *qnr* genes confer ciprofloxacin MIC fold increases between 4 and 125. The median ciprofloxacin  
249 MIC fold increase differed per *qnr* allele (Table 2).

### 250 ***aac(6')Ib-cr* and *crpP***

251 A plasmid mediated mutant *aac(6')Ib* gene that decreased fluoroquinolone susceptibility in *E.*  
252 *coli* was discovered in 2006.<sup>42</sup> Until then, *aac(6')Ib* genes were only known to decrease *E. coli*  
253 susceptibility to aminoglycosides. A double mutation in the acetyltransferase-encoding gene  
254 enabled the resulting protein to acetylate both aminoglycosides and some fluoroquinolones,  
255 including ciprofloxacin. This novel variant, *aac(6')Ib-cr*, was shown to confer a median fold  
256 increase in ciprofloxacin MIC of 6.9 (range: 1-62.5x fold increase, Table 2).<sup>52,71-76</sup>

257 The most recently discovered ciprofloxacin resistance determinant in *E. coli* is *crpP*, a plasmid-  
258 mediated gene coding for a protein with the putative ability to phosphorylate certain  
259 fluoroquinolones such as ciprofloxacin.<sup>43</sup> *crpP* was first detected in a clinical isolate of  
260 *Pseudomonas aeruginosa*, but was shown to confer a 7.5 fold-change increase in ciprofloxacin  
261 MIC when conjugated to *E. coli* J53.

## 262 **Effect of multiple modifications on MIC**

263 The fold change in MIC of each included experimental isolate was plotted, stratified for the  
264 resistance mechanism present (Figure 3). Target alteration resulted in the largest range of MIC  
265 fold changes which were on average higher than the fold changes observed as a result of the  
266 three other mechanisms. Whilst the presence of determinants representing different  
267 ciprofloxacin resistance mechanisms may result in a moderate fold change in MIC, the  
268 accumulation of multiple resistance determinants encoding multiple mechanisms of resistance is  
269 likely to increase the ciprofloxacin MIC significantly.

## 270 **Comparison of experimental and observational data**

271 We compared the findings from the experimental data with susceptibility test results and  
272 associated presence of mutations reported for isolates in observational studies. Because studies  
273 were excluded if isolates were not tested for the presence of all known resistance encoding  
274 determinants, only studies could be included that were published after *oqxAB* was linked to  
275 increased ciprofloxacin MIC in 2007.<sup>35</sup> The description of *crpP* was only recently published and  
276 was therefore not used as an inclusion criterion. Only three observational studies reported on  
277 the presence of all currently known resistance determinants.<sup>33,97,98</sup> Since mutations in both *acrR*  
278 and *marR* genes were shown to result in no to low fold changes in ciprofloxacin MIC, we added  
279 five observational studies that fulfilled all inclusion and exclusion criteria except testing for the  
280 presence of mutations in *acrR* and *marR* genes, in a secondary analysis. Thus, eight

281 observational studies published between 2012 and 2018 were included, contributing data on a  
282 total of 238 strains (Table S2). The studies reported data on 1 to 92 isolates, with a median of  
283 13.5 isolates per study. Ciprofloxacin MICs of included isolates ranged from 0.015 to 1024 mg/L  
284 with a median MIC of 1 mg/L.

285 We analysed MIC distributions for combinations of resistance determinants that were reported at  
286 least five times in the experimental and observational data. These combinations of resistance  
287 determinants included the mutation Ser83Leu in *gyrA*, presence of *qnrS1* and presence of  
288 *aac(6')Ib-cr*. Although for most combinations of resistance determinants small numbers of  
289 isolates were reported, results of experimental and observational data appear comparable with  
290 the exception for the reported MICs for *E. coli* strains solely harbouring *aac(6')Ib-cr* (Table 3).

291  
292 We also examined if certain combinations of resistance mechanisms were more prevalent than  
293 others in the observational data. Calculating Pearson correlation coefficients between commonly  
294 observed resistance determinants showed that *gyrA* (Ser83, Asp87) and *parC* (Ser80) mutations  
295 were positively correlated with each other. Additionally, these three mutations were shown to  
296 inversely correlate with the presence of *qnrB* and *qnrS* genes in our observational data. This  
297 inverse correlation was not observed with other frequently reported plasmid-mediated resistance  
298 determinants such as *aac(6')Ib-cr* (Figure 4).

299

### 300 **Network visualization**

301 In order to get a global picture of the mutation landscape associated with ciprofloxacin  
302 resistance, we mapped the selected chromosomal genes onto a Protein-Protein Interaction (PPI)  
303 network. The selected genes were evaluated in a wide range of *E. coli* strains, and we mapped  
304 them to the String-v10 database referring to the *E. coli* K-12 MG1655 model organism, since it

305 showed the highest number of matching edges and nodes among the strains available in String  
306 database. We noted that plasmid-associated genes like *oqxAB* and the *qnr* gene family were not  
307 described by interactomes in general, since interactomes mostly describe the core genome.  
308 Moreover, some genes (such as *yohG*) could not be mapped because they are not present in *E.*  
309 *coli* K-12 MG1655.

310 Of the 43 selected genes, 31 (72%) mapped to the PPI network, resulting in a fully connected  
311 sub-module. The network highlighted the close relationship between gene connectivity and  
312 ciprofloxacin resistance effects: the chosen visualization algorithm showed that genes with  
313 similar effects tightly grouped in the interactome (Figure 5). Particularly, the genes that had an  
314 increasing effect on ciprofloxacin resistance when mutated seemed to cluster, even if the genes  
315 belonged to different resistance mechanisms. As expected, close relationships between  
316 particular sets of genes were revealed. Transcriptional regulators such as *marR*, *acrR* and *soxS*  
317 were shown to interact with efflux pump genes such as *acrA*, *acrB*, *acrD*, *acrF* and *tolC*. Also,  
318 the physical interactions between *gyrA*, *gyrB* and *parC* were depicted in the network.

319

## 320 Discussion

321 This report provides a comprehensive and systematic analysis of 66 papers linking genotype of  
322 *E. coli* to a quantitative ciprofloxacin resistance phenotype, spanning the years 1989-2018 and  
323 amounting to a total of 604 isolates. Ciprofloxacin MIC in *E. coli* is largely affected by target  
324 mutations in specific residues in *gyrA* (Ser83 and Asp87) and *parC* (Ser80), conferring median  
325 MIC fold increases ranging from 24 for single Ser83Leu (*gyrA*) mutants to 1533 for triple  
326 Ser83Leu, Asp87Asn/Gly (*gyrA*) Ser80Ile/Arg (*parC*) mutants. However, accumulation of  
327 multiple resistance determinants, including those representing other resistance mechanisms,  
328 can increase ciprofloxacin MIC even further, up to MIC fold increases of 4000.

329 Beside the MIC fold changes that are conferred by resistance determinants, it is important to  
330 consider how these genetic resistance determinants are acquired. The SOS response is an  
331 important driver of mutation after DNA damage is induced by quinolones such as ciprofloxacin.<sup>99</sup>  
332 Two proteins that are central in the SOS response are LexA and RecA. In the absence of DNA  
333 damage, LexA dimers are bound to a SOS box (promoter region of SOS genes) and inhibit  
334 expression of SOS genes. If DNA damage is induced, for example through the presence of  
335 ciprofloxacin, RecA will bind ssDNA that is a result of the DNA damage. The activated RecA in  
336 turn mediates the self-cleavage of LexA, derepressing the SOS box, finally leading to expression  
337 of SOS genes and thus the SOS response. This SOS response induces mutations, among  
338 others, through DNA damage repair performed by error-prone DNA polymerases.<sup>100</sup>

339 Currently, four ways are known in which the SOS response affects ciprofloxacin resistance in *E.*  
340 *coli*. First, the SOS response induces a higher mutation rate, making it more likely that  
341 ciprofloxacin resistance mutations will arise within a fixed population.<sup>101</sup> Additionally, if the SOS  
342 response is knocked out in *E. coli*, ciprofloxacin MIC decreases. Clinically resistant *E. coli* that  
343 had *recA* knocked out showed MIC fold decreases of 4-8.<sup>101</sup> Furthermore, the SOS response  
344 has been shown to induce expression of some *qnr* gene families, for example *qnrB* and  
345 *qnrD*.<sup>102,103</sup> Finally, the SOS response has been shown to promote horizontal transfer of  
346 resistance genes when *E. coli* is grown in the presence of ciprofloxacin.<sup>104</sup>

347 After mutagenesis through mechanisms such as the SOS response, the fitness of the mutant  
348 indicates how likely the bacterium is to survive. In absence of ciprofloxacin, *gyrA* mutations and  
349 *parC* mutations have been shown to confer limited fitness costs compared to other resistance  
350 determinants.<sup>48,51,59,67,75</sup> Additionally, mutations in *gyrA* and *parC* show positive epistasis, as the  
351 MIC fold change of the triple Ser83Leu, Asp87Asn (*gyrA*) and Ser80Ile (*parC*) mutant is higher  
352 (2000x fold increase) than would be expected based on the MIC fold changes conferred by the  
353 individual mutations (24x, 16x and 1x fold increases, respectively).<sup>51,105</sup> This epistatic effect thus

354 raises ciprofloxacin MIC very efficiently. This, in combination with the low fitness costs in  
355 absence of ciprofloxacin might explain why ciprofloxacin resistance mutations in *gyrA* and *parC*  
356 are the most common ciprofloxacin resistance determinants observed in *E. coli*.

357 Notably, other combinations of resistance determinants also show positive epistatic effects,  
358 although the observed effects are weaker. A similar positive epistatic effect was observed for  
359 chromosomal *gyrA/parC* mutations together with plasmid-mediated resistance determinants  
360 *qepA*<sup>67</sup> and *aac(6')Ib-cr*.<sup>52,75</sup> However, experimental studies of combinations of *gyrA* and *parC*  
361 mutations with *qnr* genes showed discordant results. One study reported a negative epistatic  
362 effect on ciprofloxacin MIC of target alteration mutations with all *qnr* genes tested (*qnrA*, *qnrB*,  
363 *qnrC*, *qnrD*, *qnrS*)<sup>59</sup>, and another study observed a similar effect of target alteration mutations  
364 with *qnrB*, but the opposite effect for target alteration mutations with *qnrS* in terms of conferred  
365 MIC.<sup>52</sup>

366 The complex relation between *gyrA/parC* mutations and *qnr* genes is further illustrated by our  
367 findings from the observational data. We observed a clear negative correlation between  
368 presence of *gyrA* or *parC* mutations and presence of *qnrB* and *qnrS* genes. This finding is in line  
369 with an earlier study that reported an *E. coli* population fixating *gyrA/parC* mutations at a  
370 reduced rate when the *E. coli* population harboured a *qnr* gene as opposed to when the *E. coli*  
371 strain did not harbour a *qnr* gene.<sup>81</sup> However, no additional fitness costs are usually reported for  
372 *E. coli* harbouring both *gyrA/parC* mutations and *qnr* genes.<sup>59</sup> One possible explanation was  
373 suggested by the study of Garoff et al., who reported an enhanced fitness cost conferred by *qnr*  
374 genes when Lon protease was absent from an *E. coli* genome.<sup>106</sup> This finding shows that the  
375 fitness cost conferred by an antimicrobial resistance gene to an *E. coli* strain can be influenced  
376 by genes that do not directly play a role in antimicrobial resistance.

377 By mapping the selected genes onto a known *E. coli* interactome, we found a clear association  
378 between their role in ciprofloxacin resistance and their position in the network, with a significant



379 proximity of genes that produce a similar response in terms of resistance (i.e. increase or  
380 decrease). This global picture highlights the presence of common biological functions (mostly  
381 associated with the efflux pumps and their regulation), and it suggests that system biology  
382 approaches in the future will likely be helpful to identify new targets or specific pathways related  
383 to ciprofloxacin resistance or antimicrobial resistance in general. As an example, the position in  
384 the network of *acrD* and *acrF* genes, which were not identified as resistance-associated genes in  
385 the experiments reported so far, and their biological function as efflux pump protein complexes,  
386 suggest that their role in resistance should be more deeply investigated.

387 Despite its comprehensiveness our study has certain limitations. First, gene expression data are  
388 not included in this review because our study aims at prediction of MIC on the basis of a DNA  
389 sequence. It has been shown that increased expression of efflux pumps such as *acrAB* or  
390 transcriptional regulators of efflux pumps such as *marA* is significantly correlated with increased  
391 fluoroquinolone MIC in *E. coli*.<sup>107,108</sup> Secondly, complex combinations of resistance determinants  
392 such as combinations of *gyrA/parC* mutations with plasmid-mediated resistance determinants  
393 have been reported sparsely in the experimental data. Therefore, the comparison of  
394 experimental and observational data for these combinations of resistance determinants is  
395 impossible using this dataset. Finally, only currently known ciprofloxacin resistance determinants  
396 could be included in this report. The very recent discovery of *crpP* suggests that more resistance  
397 determinants or resistance mechanisms are still waiting to be discovered.<sup>43</sup> Additionally,  
398 complex mutation patterns influencing ciprofloxacin resistance through unknown pathways may  
399 exist, but current research methods do not usually detect these kinds of effects.

400 One possible solution for the issues described above would be the use of advanced machine  
401 learning algorithms to predict ciprofloxacin resistance. These algorithms should be able to  
402 associate large quantities of sequence data with phenotypic metadata in an unbiased manner.  
403 One such attempt has been made for ciprofloxacin resistance already.<sup>109</sup> It was reported that

404 Ser83Phe, Ser83Thr (*gyrA*), Ser80Arg (*parC*) and presence of any *qnr* gene were the most  
405 important resistance determinants according to the algorithm used. However, this study used  
406 categorical (susceptible or resistant) and not quantitative phenotype data, and included various  
407 Enterobacteriaceae species and the results can thus not be directly compared with the data  
408 presented here for *E. coli* alone. This is exemplified by the fact that neither Ser83Phe nor  
409 Ser83Thr (*gyrA*) were reported in our observational data. For future studies, the data collected  
410 for this review could serve as a benchmark, as this review presents a comprehensive set of  
411 quantitative data on the contribution of various resistance determinants to ciprofloxacin MIC in *E.*  
412 *coli*.

413

## 414 **Acknowledgments**

415 We wish to thank the COMPARE consortium for support and helpful discussions.

416

## 417 **Funding**

418 No specific funding has been received for this work. BP was funded through an internal grant  
419 from the Academic Medical Center Amsterdam ('Flexible OiO' grant).

420

## 421 **Transparency**

422 None to declare.

423

## 424 References

- 425 1. Tenaillon O, Skurnik D, Picard B *et al.* The population genetics of commensal *Escherichia*  
426 *coli*. *Nat Rev Microbiol.* 2010;8(1740-1534):207-217. doi:10.1038/nrmicro2298
- 427 2. ECDC. *Annual Report of the European Antimicrobial Resistance Surveillance Network*  
428 *(EARS-Net)*.; 2014. doi:10.2900/93403
- 429 3. Johns Hopkins Medicine. *Antibiotic Guidelines 2015-2016*.; 2016.
- 430 4. LeBel M. Ciprofloxacin: Chemistry, Mechanism of Action, Resistance, Antimicrobial  
431 Spectrum, Pharmacokinetics, Clinical Trials, and Adverse Reactions. *Pharmacother J*  
432 *Hum Pharmacol Drug Ther.* 1988;8(1):3-30.
- 433 5. Khodursky A, Zechiedrich E, Cozzarelli N. Topoisomerase IV is a target of quinolones in  
434 *Escherichia coli*. 1995;92(December):11801-11805.
- 435 6. Drlica K. Mechanism of fluoroquinolone action. *Curr Opin Microbiol.* 1999;2(5):504-508.  
436 doi:10.1016/S1369-5274(99)00008-9
- 437 7. Cozzarelli NR. DNA gyrase and the supercoiling of DNA. *Science (80- )*.  
438 1980;207(4434):953-960. doi:10.1126/science.6243420
- 439 8. Kampranis SC, Maxwell A. The DNA Gyrase-Quinolone Complex. *J Biol Chem.*  
440 1998;273(35):22615-22626.
- 441 9. Anderson VE, Gootz TD, Osheroff N. Topoisomerase IV catalysis and the mechanism of  
442 quinolone action. *J Biol Chem.* 1998;273(28):17879-17885. doi:10.1074/jbc.273.28.17879
- 443 10. Cullen ME, Wyke AW, Kuroda R *et al.* Cloning and characterization of a DNA gyrase A  
444 gene from *Escherichia coli* that confers clinical resistance to 4-quinolones. *Antimicrob*

- 445            *Agents Chemother.* 1989;33(6):886-894. doi:10.1128/AAC.33.6.886
- 446    11.    Heisig P. Genetic Evidence for a Role of parC Mutations in Development of High-Level  
447            Fluoroquinolone Resistance in Escherichia coli. 1996;40(4):879-885.
- 448    12.    Hooper DC, Wolfson JS, Ng EY *et al.* Mechanisms of action of and resistance to  
449            ciprofloxacin. *Am J Med.* 1987;82(4A):12-20.
- 450    13.    Hooper DC. Mechanisms of Action and Resistance of Older and Newer Fluoroquinolones.  
451            *Clin Infect Dis.* 2000;31:S24-S28. doi:10.1086/314056
- 452    14.    Hooper DC. Emerging mechanisms of fluoroquinolone resistance. *Emerg Infect Dis.*  
453            2001;7(2):337-341. doi:10.3201/eid0702.010239
- 454    15.    Hooper DC. Mechanisms of fluoroquinolone resistance. *Drug Resist Updat.* 1999;2(1):38-  
455            55. doi:http://dx.doi.org/10.1054/drup.1998.0068
- 456    16.    Webber M, Piddock LJ. Quinolone resistance in Escherichia coli. *Vet Res.* 2001;32(3-  
457            4):275-284. doi:10.1051/vetres:2001124
- 458    17.    Strahilevitz J, Jacoby GA, Hooper DC *et al.* Plasmid-mediated quinolone resistance: A  
459            multifaceted threat. *Clin Microbiol Rev.* 2009;22(4):664-689. doi:10.1128/CMR.00016-09
- 460    18.    Hawkey PM. Mechanisms of quinolone action and microbial response. *J Antimicrob*  
461            *Chemother.* 2003;51:29-35. doi:10.1093/jac/dkg207
- 462    19.    Hopkins KL, Davies RH, Threlfall EJ. Mechanisms of quinolone resistance in Escherichia  
463            coli and Salmonella: Recent developments. *Int J Antimicrob Agents.* 2005;25(5):358-373.  
464            doi:10.1016/j.ijantimicag.2005.02.006
- 465    20.    Moher D, Liberati A, Tetzlaff J *et al.* Preferred reporting items for systematic reviews and  
466            meta-analyses: The PRISMA statement. *PLoS Med.* 2009;6(7).

- 467           doi:10.1371/journal.pmed.1000097
- 468    21.    Andrews JM, Andrews JM. Determination of minimum inhibitory concentrations. *J*  
469           *Antimicrob Chemother.* 2001;48:5-16. doi:10.1093/jac/48.suppl\_1.5
- 470    22.    The European Committee on Antimicrobial Susceptibility Testing. Breakpoint tables for  
471           interpretation of MICs and zone diameters. version 8.1.  
472           [http://www.eucast.org/clinical\\_breakpoints/](http://www.eucast.org/clinical_breakpoints/). Published 2018.
- 473    23.    The European Committee on Antimicrobial Susceptibility Testing. MIC and zone diameter  
474           distributions and ECOFFs. [http://www.eucast.org/mic\\_distributions\\_and\\_ecoffs/](http://www.eucast.org/mic_distributions_and_ecoffs/).  
475           Published 2018.
- 476    24.    Heisig P, Wiedemann B. Use of a broad-host-range gyrA plasmid for genetic  
477           characterization of fluoroquinolone-resistant gram-negative bacteria. *Antimicrob Agents*  
478           *Chemother.* 1991;35(10):2031-2036. doi:10.1128/aac.
- 479    25.    Szkarczyk D, Franceschini A, Wyder S *et al.* STRING v10: Protein-protein interaction  
480           networks, integrated over the tree of life. *Nucleic Acids Res.* 2015;43(D1):D447-D452.  
481           doi:10.1093/nar/gku1003
- 482    26.    Hu P, Janga SC, Babu M *et al.* Global functional atlas of Escherichia coli encompassing  
483           previously uncharacterized proteins. *PLoS Biol.* 2009;7(4):0929-0947.  
484           doi:10.1371/journal.pbio.1000096
- 485    27.    Ogris C, Guala D, Kaduk M *et al.* FunCoup 4: new species, data, and visualization.  
486           *Nucleic Acids Res.* 2018;46(D1):D601-D607. doi:10.1093/nar/gkx1138
- 487    28.    Zhou J, Rudd KE. EcoGene 3.0. *Nucleic Acids Res.* 2013;41(D1):613-624.  
488           doi:10.1093/nar/gks1235

- 489 29. Yoshida H, Bogaki M, Nakamura M *et al.* Quinolone Resistance-Determining Region in  
490 the DNA Gyrase gyrB Gene of Escherichia coli. *Antimicrob Agents Chemother.*  
491 1991;35(8):1647-1650.
- 492 30. Linde HJ, Notka F, Metz M *et al.* In vivo increase in resistance to ciprofloxacin in  
493 Escherichia coli associated with deletion of the C-terminal part of marR. *Antimicrob*  
494 *Agents Chemother.* 2000;44(7):1865-1868. doi:10.1128/AAC.44.7.1865-1868.2000
- 495 31. Sulavik MC, Houseweart C, Cramer C *et al.* Antibiotic Susceptibility Profiles of  
496 Escherichia coli Strains Lacking Multidrug Efflux Pump Genes. *Antimicrob Agents*  
497 *Chemother.* 2001;45(5):1126-1136. doi:10.1128/AAC.45.4.1126
- 498 32. Aly SA, Boothe DM, Suh SJ. A novel alanine to serine substitution mutation in SoxS  
499 induces overexpression of efflux pumps and contributes to multidrug resistance in clinical  
500 Escherichia coli isolates. *J Antimicrob Chemother.* 2015;70(8):2228-2233.  
501 doi:10.1093/jac/dkv105
- 502 33. Pietsch F, Bergman JM, Brandis G *et al.* Ciprofloxacin selects for RNA polymerase  
503 mutations with pleiotropic antibiotic resistance effects. *J Antimicrob Chemother.*  
504 2017;72(1):75-84. doi:10.1093/jac/dkw364
- 505 34. Yamane K, Wachino JI, Suzuki S *et al.* New plasmid-mediated fluoroquinolone efflux  
506 pump, QepA, found in an Escherichia coli clinical isolate. *Antimicrob Agents Chemother.*  
507 2007;51(9):3354-3360. doi:10.1128/AAC.00339-07
- 508 35. Hansen LH, Jensen LB, Sørensen HI *et al.* Substrate specificity of the OqxAB multidrug  
509 resistance pump in Escherichia coli and selected enteric bacteria. *J Antimicrob*  
510 *Chemother.* 2007;60(1):145-147. doi:10.1093/jac/dkm167
- 511 36. Tran JH, Jacoby GA. Mechanism of plasmid-mediated quinolone resistance. *Proc Natl*

- 512 *Acad Sci.* 2002;99(8):5638-5642. doi:10.1073/pnas.082092899
- 513 37. Jacoby GA, Walsh KE, Mills DM *et al.* qnrB, Another Plasmid-Mediated Gene for  
514 Quinolone Resistance. *Antimicrob Agents Chemother.* 2006;50(4):1178-1182.  
515 doi:10.1128/AAC.50.4.1178
- 516 38. Wang M, Guo Q, Xu X *et al.* New plasmid-mediated quinolone resistance gene, qnrC,  
517 found in a clinical isolate of *Proteus mirabilis*. *Antimicrob Agents Chemother.*  
518 2009;53(5):1892-1897. doi:10.1128/AAC.01400-08
- 519 39. Cavaco LM, Hasman H, Xia S *et al.* qnrD, a novel gene conferring transferable quinolone  
520 resistance in *Salmonella enterica* serovar Kentucky and *Bovismorbificans* strains of  
521 human origin. *Antimicrob Agents Chemother.* 2009;53(2):603-608.  
522 doi:10.1128/AAC.00997-08
- 523 40. Albornoz E, Tijet N, De Belder D *et al.* QnrE1, a member of a new family of plasmid-  
524 located quinolone resistance genes, originated from the chromosome of enterobacter  
525 species. *Antimicrob Agents Chemother.* 2017;61(5):1-8. doi:10.1128/AAC.02555-16
- 526 41. Hata M, Suzuki M, Matsumoto M *et al.* Cloning of a Novel Gene for Quinolone Resistance  
527 from a Transferable Plasmid in *Shigella flexneri* 2b. *Antimicrob Agents Chemother.*  
528 2005;49(2):801-803. doi:10.1128/AAC.49.2.801
- 529 42. Robicsek A, Strahilevitz J, Jacoby GA *et al.* Fluoroquinolone-modifying enzyme: a new  
530 adaptation of a common aminoglycoside acetyltransferase. *Nat Med.* 2006;12(1):83-88.  
531 doi:10.1038/nm1347
- 532 43. Chávez-Jacobo V, Hernández-Ramírez K, Romo-Rodríguez P *et al.* CrpP Is a Novel  
533 Ciprofloxacin-Modifying Enzyme Encoded by the *Pseudomonas aeruginosa* pUM505  
534 Plasmid. *Antimicrob Agents Chemother.* 2018;62(6):1-11.

- 535 44. Breines DM, Ouabdesselam S, Ng EY *et al.* Quinolone resistance locus nfxD of  
536 *Escherichia coli* is a mutant allele of the parE gene encoding a subunit of topoisomerase  
537 IV. *Antimicrob Agents Chemother.* 1997;41(1):175-179.
- 538 45. Weigel LM, Steward CD, Tenover FC. gyrA mutations associated with fluoroquinolone  
539 resistance in eight species of Enterobacteriaceae. *Antimicrob Agents Chemother.*  
540 1998;42(10):2661-2667.
- 541 46. Liu X, Lazzaroni C, Aly SA *et al.* In vitro selection of resistance to pradofloxacin and  
542 ciprofloxacin in canine uropathogenic *Escherichia coli* isolates. *Vet Microbiol.* 2014;174(3-  
543 4):514-522. doi:10.1016/j.vetmic.2014.10.011
- 544 47. Heisig P, Tschorny R. Characterization of fluoroquinolone-resistant mutants of  
545 *Escherichia coli* selected in vitro. 1994;38(6):1284-1291. doi:10.1128/AAC..Updated
- 546 48. Huseby DL, Pietsch F, Brandis G *et al.* Mutation Supply and Relative Fitness Shape the  
547 Genotypes of Ciprofloxacin-Resistant *Escherichia coli*. *Mol Biol Evol.* 2017;34(5):1029-  
548 1039. doi:10.1093/molbev/msx052
- 549 49. Truong QC, Van Nguyen JC, Shlaes D *et al.* A novel, double mutation in DNA gyrase A of  
550 *Escherichia coli* conferring resistance to quinolone antibiotics. *Antimicrob Agents*  
551 *Chemother.* 1997;41(1):85-90.
- 552 50. Allou N, Cambau E, Massias L *et al.* Impact of low-level resistance to fluoroquinolones  
553 due to qnrA1 and qnrS1 genes or a gyrA mutation on ciprofloxacin bactericidal activity in  
554 a murine model of *Escherichia coli* urinary tract infection. *Antimicrob Agents Chemother.*  
555 2009;53(10):4292-4297. doi:10.1128/AAC.01664-08
- 556 51. Marcusson LL, Frimodt-Møller N, Hughes D. Interplay in the selection of fluoroquinolone  
557 resistance and bacterial fitness. *PLoS Pathog.* 2009;5(8).



558 doi:10.1371/journal.ppat.1000541

559 52. Emrich NC, Heisig A, Stubbings W *et al.* Antibacterial activity of finafloxacin under  
560 different pH conditions against isogenic strains of *Escherichia coli* expressing  
561 combinations of defined mechanisms of fluoroquinolone resistance. *J Antimicrob*  
562 *Chemother.* 2010;65(12):2530-2533. doi:10.1093/jac/dkq375

563 53. Briales A, Rodríguez-Martínez JM, Velasco C *et al.* In vitro effect of qnrA1, qnrB1, and  
564 qnrS1 genes on fluoroquinolone activity against isogenic *Escherichia coli* isolates with  
565 mutations in *gyrA* and *parC*. *Antimicrob Agents Chemother.* 2011;55(3):1266-1269.  
566 doi:10.1128/AAC.00927-10

567 54. Khan DD, Lagerbäck P, Cao S *et al.* A mechanism-based  
568 pharmacokinetic/pharmacodynamic model allows prediction of antibiotic killing from MIC  
569 values for WT and mutants. *J Antimicrob Chemother.* 2015;70(11):3051-3060.  
570 doi:10.1093/jac/dkv233

571 55. Webber MA, Buckner MMC, Redgrave LS *et al.* Quinolone-resistant gyrase mutants  
572 demonstrate decreased susceptibility to triclosan. *J Antimicrob Chemother.*  
573 2017;72(10):2755-2763. doi:10.1093/jac/dkx201

574 56. Cambau E, Bordon F, Collatz E. Novel *gyrA* point mutation in a strain of *Escherichia coli*  
575 resistant to fluoroquinolones but not to nalidixic acid. *Antimicrob Agents Chemother.*  
576 1993;37(6):1247-1252. doi:10.1128/AAC.37.6.1247.Updated

577 57. Oethinger M, Kern W V., Jellen-Ritter AS *et al.* Ineffectiveness of topoisomerase  
578 mutations in mediating clinically significant fluoroquinolone resistance in *Escherichia coli*  
579 in the absence of the AcrAB efflux pump. *Antimicrob Agents Chemother.* 2000;44(1):10-  
580 13. doi:10.1128/AAC.44.1.10-13.2000

- 581 58. Yaron S, White DG, Matthews KR. Characterization of an Escherichia coli O157:H7 marR  
582 mutant. *Int J Food Microbiol.* 2003;85(3):281-291. doi:10.1016/S0168-1605(02)00547-0
- 583 59. Machuca J, Briales A, Labrador G *et al.* Interplay between plasmid-mediated and  
584 chromosomal-mediated fluoroquinolone resistance and bacterial fitness in Escherichia  
585 coli. *J Antimicrob Chemother.* 2014;69(12):3203-3215. doi:10.1093/jac/dku308
- 586 60. Praski Alzrigat L, Huseby DL, Brandis G *et al.* Fitness cost constrains the spectrum of  
587 marR mutations in ciprofloxacin-resistant Escherichia coli. *J Antimicrob Chemother.*  
588 2017;72(11):3016-3024. doi:10.1093/jac/dkx270
- 589 61. Blair JMA, Bavro VN, Ricci V *et al.* AcrB drug-binding pocket substitution confers clinically  
590 relevant resistance and altered substrate specificity. *Proc Natl Acad Sci U S A.*  
591 2015;112(11):3511-3516. doi:10.1073/pnas.1419939112
- 592 62. Zhao J, Chen Z, Chen S *et al.* Prevalence and dissemination of oqxAB in Escherichia coli  
593 isolates from animals, farmworkers, and the environment. *Antimicrob Agents Chemother.*  
594 2010;54(10):4219-4224. doi:10.1128/AAC.00139-10
- 595 63. Sato T, Yokota SI, Uchida I *et al.* Fluoroquinolone resistance mechanisms in an  
596 Escherichia coli isolate, HUE1, without quinolone resistance-determining region  
597 mutations. *Front Microbiol.* 2013;4(May):1-12. doi:10.3389/fmicb.2013.00125
- 598 64. Wang J, Guo Z-W, Zhi C-P *et al.* Impact of plasmid-borne oqxAB on the development of  
599 fluoroquinolone resistance and bacterial fitness in Escherichia coli. *J Antimicrob*  
600 *Chemother.* 2017;72(5):1293-1302. doi:10.1093/jac/dkw576
- 601 65. Yamane K, Wachino JI, Suzuki S *et al.* Plasmid-mediated qepA gene among Escherichia  
602 coli clinical isolates from Japan. *Antimicrob Agents Chemother.* 2008;52(4):1564-1566.  
603 doi:10.1128/AAC.01137-07

- 604 66. Périchon B, Courvalin P, Galimand M. Transferable resistance to aminoglycosides by  
605 methylation of G1405 in 16S rRNA and to hydrophilic fluoroquinolones by QepA-mediated  
606 efflux in *Escherichia coli*. *Antimicrob Agents Chemother.* 2007;51(7):2464-2469.  
607 doi:10.1128/AAC.00143-07
- 608 67. Machuca J, Briales A, Díaz-de-Alba P *et al.* Effect of the efflux pump QepA2 combined  
609 with chromosomally mediated mechanisms on quinolone resistance and bacterial fitness  
610 in *Escherichia coli*. *J Antimicrob Chemother.* 2015;70(9):2524-2527.  
611 doi:10.1093/jac/dkv144
- 612 68. Manageiro V, Félix D, Jones-Dias D *et al.* Genetic background and expression of the new  
613 qepa4 gene variant recovered in clinical TEM-1- and CMY-2-producing *Escherichia coli*.  
614 *Front Microbiol.* 2017;8(Oct):1-6. doi:10.3389/fmicb.2017.01899
- 615 69. Tran JH, Jacoby GA, Hooper DC. Interaction of the Plasmid-Encoded Quinolone  
616 Resistance Protein QnrA with *Escherichia coli* Topoisomerase IV Interaction of the  
617 Plasmid-Encoded Quinolone Resistance Protein QnrA with *Escherichia coli*  
618 Topoisomerase IV. *Antimicrob Agents Chemother.* 2005;49(7):4-7.  
619 doi:10.1128/AAC.49.7.3050
- 620 70. Jacoby GA. qnr Numbering and Sequences. <http://www.lahey.org/qnrstudies/>. Accessed  
621 January 26, 2018.
- 622 71. Chowdhury G, Pazhani GP, Nair GB *et al.* Transferable plasmid-mediated quinolone  
623 resistance in association with extended-spectrum  $\beta$ -lactamases and fluoroquinolone-  
624 acetylating aminoglycoside-6'-N-acetyltransferase in clinical isolates of *Vibrio fluvialis*. *Int*  
625 *J Antimicrob Agents.* 2011;38(2):169-173. doi:10.1016/j.ijantimicag.2011.04.013
- 626 72. Silva-Sánchez J, Cruz-Trujillo E, Barrios H *et al.* Characterization of Plasmid-Mediated

- 627 Quinolone Resistance (PMQR) Genes in Extended-Spectrum  $\beta$ -Lactamase-Producing  
628 Enterobacteriaceae Pediatric Clinical Isolates in Mexico. *PLoS One*. 2013;8(10).  
629 doi:10.1371/journal.pone.0077968
- 630 73. Shaheen BW, Nayak R, Foley SL *et al*. Chromosomal and plasmid-mediated  
631 fluoroquinolone resistance mechanisms among broad-spectrum-cephalosporin-resistant  
632 *Escherichia coli* isolates recovered from companion animals in the USA. *J Antimicrob*  
633 *Chemother*. 2013;68(5):1019-1024. doi:10.1093/jac/dks514
- 634 74. Varela AR, Macedo GN, Nunes OC *et al*. Genetic characterization of fluoroquinolone  
635 resistant *Escherichia coli* from urban streams and municipal and hospital effluents. *FEMS*  
636 *Microbiol Ecol*. 2015;91(5):1-12. doi:10.1093/femsec/fiv015
- 637 75. Machuca J, Ortiz M, Recacha E *et al*. Impact of AAC(6')-Ib-cr in combination with  
638 chromosomal-mediated mechanisms on clinical quinolone resistance in *Escherichia coli*. *J*  
639 *Antimicrob Chemother*. 2016;(July):6-11. doi:10.1093/jac/dkw258
- 640 76. Yanat B, Machuca J, Díaz-De-Alba P *et al*. Characterization of Plasmid-Mediated  
641 Quinolone Resistance Determinants in High-Level Quinolone-Resistant  
642 *Enterobacteriaceae* Isolates from the Community: First Report of *qnrD* Gene in Algeria.  
643 *Microb Drug Resist*. 2017;23(1):90-97. doi:10.1089/mdr.2016.0031
- 644 77. Heisig P, Schedletzky H, Falkenstein-Paul H. Mutations in the *gyrA* gene of a highly  
645 fluoroquinolone-resistant clinical isolate of *Escherichia coli*. *Antimicrob Agents*  
646 *Chemother*. 1993;37(4):696-701. doi:10.1128/AAC.37.4.696
- 647 78. Webber MA, Talukder A, Piddock LJ V. Contribution of mutation at amino acid 45 of AcrR  
648 to *acrB* expression and ciprofloxacin resistance in clinical and veterinary *Escherichia coli*  
649 isolates. *Antimicrob Agents Chemother*. 2005;49(10):4390-4392.

- 650 doi:10.1128/AAC.49.10.4390-4392.2005
- 651 79. Silva-Sanchez J, Barrios H, Reyna-Flores F *et al.* Prevalence and Characterization of  
652 Plasmid-Mediated Quinolone Resistance Genes in Extended-Spectrum  $\beta$ -Lactamase–  
653 Producing Enterobacteriaceae Isolates in Mexico. *Microb Drug Resist.* 2011;17(4):497-  
654 505. doi:10.1089/mdr.2011.0086
- 655 80. Goto K, Kawamura K, Arakawa Y. Contribution of QnrA, a plasmid-mediated quinolone  
656 resistance peptide, to survival of Escherichia coli exposed to a lethal ciprofloxacin  
657 concentration. *Jpn J Infect Dis.* 2015;68(3):196-202. doi:10.7883/yoken.JJID.2014.153
- 658 81. Cesaro A, Bettoni RRD, Lascols C *et al.* Low selection of topoisomerase mutants from  
659 strains of Escherichia coli harbouring plasmid-borne qnr genes. *J Antimicrob Chemother.*  
660 2008;61(5):1007-1015. doi:10.1093/jac/dkn077
- 661 82. Jakobsen L, Cattoir V, Jensen KS *et al.* Impact of low-level fluoroquinolone resistance  
662 genes qnrA1, qnrB19 and qnrS1 on ciprofloxacin treatment of isogenic Escherichia coli  
663 strains in a murine urinary tract infection model. *J Antimicrob Chemother.*  
664 2012;67(10):2438-2444. doi:10.1093/jac/dks224
- 665 83. Martínez-Martínez L, Pascual A, Jacoby GA *et al.* Quinolone resistance from a  
666 transferable plasmid. *Lancet.* 1998;351(9105):797-799. doi:10.1016/S0140-  
667 6736(97)07322-4
- 668 84. Martínez-Martínez L, Pascual A, García I *et al.* Interaction of plasmid and host quinolone  
669 resistance. *J Antimicrob Chemother.* 2003;51(4):1037-1039. doi:10.1093/jac/dkg157
- 670 85. Martin-Gutierrez G, Rodriguez-Martinez JM, Pascual A *et al.* Plasmidic qnr Genes Confer  
671 Clinical Resistance to Ciprofloxacin under Urinary Tract Physiological Conditions.  
672 *Antimicrob Agents Chemother.* 2017;61(4):61-64.

- 673 86. Rodríguez-Martínez JM, Velasco C, Pascual A *et al.* Correlation of quinolone resistance  
674 levels and differences in basal and quinolone-induced expression from three qnrA-  
675 containing plasmids. *Clin Microbiol Infect.* 2006;12(5):440-445. doi:10.1111/j.1469-  
676 0691.2006.01389.x
- 677 87. Rodríguez-Martínez JM, Velasco C, Briales A *et al.* Qnr-like pentapeptide repeat proteins  
678 in Gram-positive bacteria. *J Antimicrob Chemother.* 2008;61(6):1240-1243.  
679 doi:10.1093/jac/dkn115
- 680 88. Wang M, Tran J, Jacoby G. Plasmid-mediated quinolone resistance in clinical isolates of  
681 *Escherichia coli* from Shanghai, China. *Antimicrob Agents Chemother.* 2003;47(7):2242-  
682 2248. doi:10.1128/AAC.47.7.2242
- 683 89. Xu X, Wu S, Ye X *et al.* Prevalence and expression of the plasmid-mediated quinolone  
684 resistance determinant qnrA1. *Antimicrob Agents Chemother.* 2007;51(11):4105-4110.  
685 doi:10.1128/AAC.00616-07
- 686 90. Jones-Dias D, Manageiro V, Francisco AP *et al.* Assessing the molecular basis of  
687 transferable quinolone resistance in *Escherichia coli* and *Salmonella* spp. from food-  
688 producing animals and food products. *Vet Microbiol.* 2013;167(3-4):523-531.  
689 doi:10.1016/j.vetmic.2013.08.010
- 690 91. Shin JH, Jung H, Lee J *et al.* High rates of plasmid-mediated quinolone resistance QnrB  
691 variants among ciprofloxacin-resistant *Escherichia coli* and *Klebsiella pneumoniae* from  
692 urinary tract infections in Korea. *Microb Drug Resist.* 2008;14(3):221-226.  
693 doi:10.1089/mdr.2008.0834
- 694 92. Cerquetti M, García-Fernández A, Giufrè M *et al.* First report of plasmid-mediated  
695 quinolone resistance determinant qnrS1 in an *Escherichia coli* strain of animal origin in

- 696 Italy. *Antimicrob Agents Chemother.* 2009;53(7):3112-3114. doi:10.1128/AAC.00239-09
- 697 93. Okumura R, Liao CH, Gavin M *et al.* Quinolone induction of qnrVS1 in *Vibrio splendidus*  
698 and plasmid-carried qnrS1 in *Escherichia coli*, a mechanism independent of the SOS  
699 system. *Antimicrob Agents Chemother.* 2011;55(12):5942-5945. doi:10.1128/AAC.05142-  
700 11
- 701 94. Xue G, Li J, Feng Y *et al.* High Prevalence of Plasmid-Mediated Quinolone Resistance  
702 Determinants in *Escherichia coli* and *Klebsiella pneumoniae* Isolates from Pediatric  
703 Patients in China. *Microb Drug Resist.* 2017;23(1):107-114. doi:10.1089/mdr.2016.0004
- 704 95. Bönemann G, Stiens M, Pühler A *et al.* Mobilizable IncQ-related plasmid carrying a new  
705 quinolone resistance gene, qnrS2, isolated from the bacterial community of a wastewater  
706 treatment plant. *Antimicrob Agents Chemother.* 2006;50(9):3075-3080.  
707 doi:10.1128/AAC.00378-06
- 708 96. Ruiz E, Sáenz Y, Zarazaga M *et al.* Qnr, aac(6')-Ib-cr and qepA genes in *Escherichia coli*  
709 and *Klebsiella* spp.: Genetic environments and plasmid and chromosomal location. *J*  
710 *Antimicrob Chemother.* 2012;67(4):886-897. doi:10.1093/jac/dkr548
- 711 97. Sekyere JO, Amoako DG. Genomic and phenotypic characterisation of fluoroquinolone  
712 resistance mechanisms in Enterobacteriaceae in Durban, South Africa. *PLoS One.*  
713 2017;12(6):1-14. doi:10.1371/journal.pone.0178888
- 714 98. Vinué L, Hooper DC, Jacoby GA. Chromosomal mutations that accompany qnr in clinical  
715 isolates of *Escherichia coli*. *Int J Antimicrob Agents.* 2018.  
716 doi:10.1016/j.ijantimicag.2018.01.012
- 717 99. Walker G. Mutagenesis and inducible responses to deoxyribonucleic acid damage in  
718 *Escherichia coli*. *Microbiol Rev.* 1984;48(1):60-93.

- 719 100. Erill I, Campoy S, Barbé J. Aeons of distress: An evolutionary perspective on the bacterial  
720 SOS response. *FEMS Microbiol Rev.* 2007;31(6):637-656. doi:10.1111/j.1574-  
721 6976.2007.00082.x
- 722 101. Recacha E, Machuca J, Díaz de Alba P *et al.* Quinolone resistance reversion by targeting  
723 the SOS response. *MBio.* 2017;8(5). doi:10.1128/mBio.00971-17
- 724 102. Da Re S, Garnier F, Guérin E *et al.* The SOS response promotes qnrB quinolone-  
725 resistance determinant expression. *EMBO Rep.* 2009;10(8):929-933.  
726 doi:10.1038/embor.2009.99
- 727 103. Wang M, Jacoby GA, Mills DM *et al.* SOS regulation of qnrB expression. *Antimicrob*  
728 *Agents Chemother.* 2009;53(2):821-823. doi:10.1128/AAC.00132-08
- 729 104. Beaber JW, Hochhut B, Waldor MK. SOS response promotes horizontal dissemination of  
730 antibiotic resistance genes. *Nature.* 2004;427(January):72-74. doi:10.1038/nature02241
- 731 105. Hughes D, Andersson DI. Evolutionary Trajectories to Antibiotic Resistance. *Annu Rev*  
732 *Microbiol.* 2017;71(1):579-596. doi:10.1146/annurev-micro-090816-093813
- 733 106. Garoff L, Yadav K, Hughes D. Increased expression of Qnr is sufficient to confer clinical  
734 resistance to ciprofloxacin in *Escherichia coli*. *J Antimicrob Chemother.*  
735 2017;(January):348-352. doi:10.1093/jac/dkx375
- 736 107. Shigemura K, Tanaka K, Yamamichi F *et al.* Does mutation in gyrA and/or parC or efflux  
737 pump expression play the main role in fluoroquinolone resistance in *Escherichia coli*  
738 urinary tract infections?: A statistical analysis study. *Int J Antimicrob Agents.*  
739 2012;40(6):516-520. doi:10.1016/j.ijantimicag.2012.07.019
- 740 108. Swick MC, Morgan-Linnell SK, Carlson KM *et al.* Expression of multidrug efflux pump  
741 genes *acrAB-tolC*, *mdfA*, and *norE* in *Escherichia coli* clinical isolates as a function of



742 fluoroquinolone and multidrug resistance. *Antimicrob Agents Chemother.* 2011;55(2):921-  
743 924. doi:10.1128/AAC.00996-10

744 109. Pesesky MW, Hussain T, Wallace M *et al.* Evaluation of machine learning and rules-  
745 based approaches for predicting antimicrobial resistance profiles in gram-negative bacilli  
746 from whole genome sequence data. *Front Microbiol.* 2016;7(NOV):1-17.  
747 doi:10.3389/fmicb.2016.01887

748

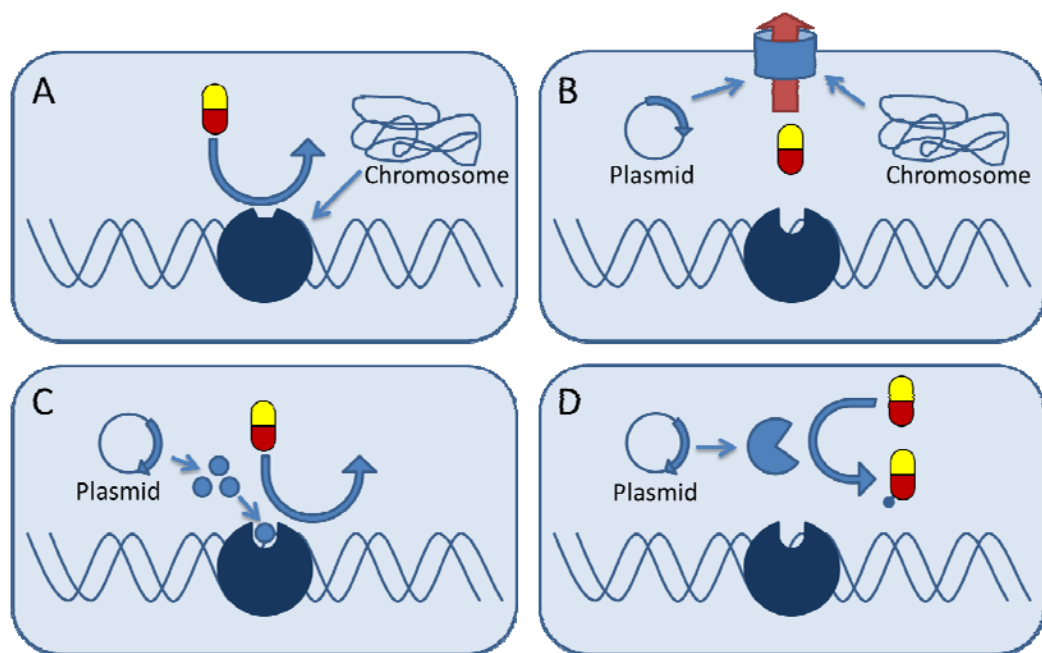

749

750 **Figure 1.** Schematic representation of four mechanisms of ciprofloxacin resistance in *E. coli*. A)

751 Target alteration. B) Decreased ciprofloxacin accumulation. C) Physical blocking of ciprofloxacin

752 target. D) Enzymatic modification of ciprofloxacin.

753

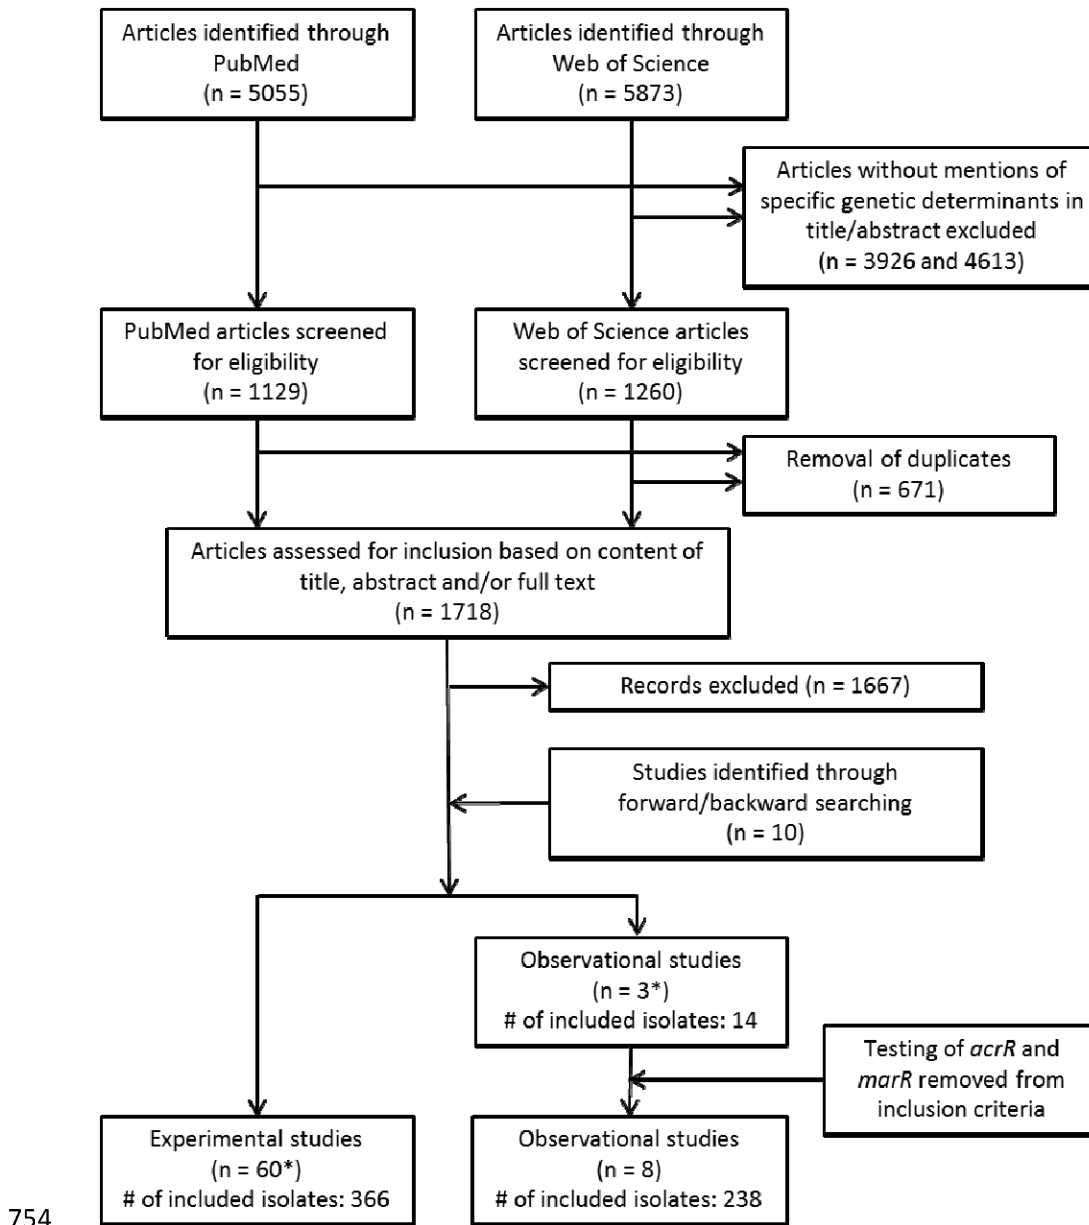

754

755 **Figure 2.** Flow chart adapted from the PRISMA guidelines (Moher 2009), showing the process

756 of including articles starting from a systematic search of PubMed and Web of Science. \*2

757 Studies contributed experimental and observational data, and were thus included for both types

758 of articles.

759

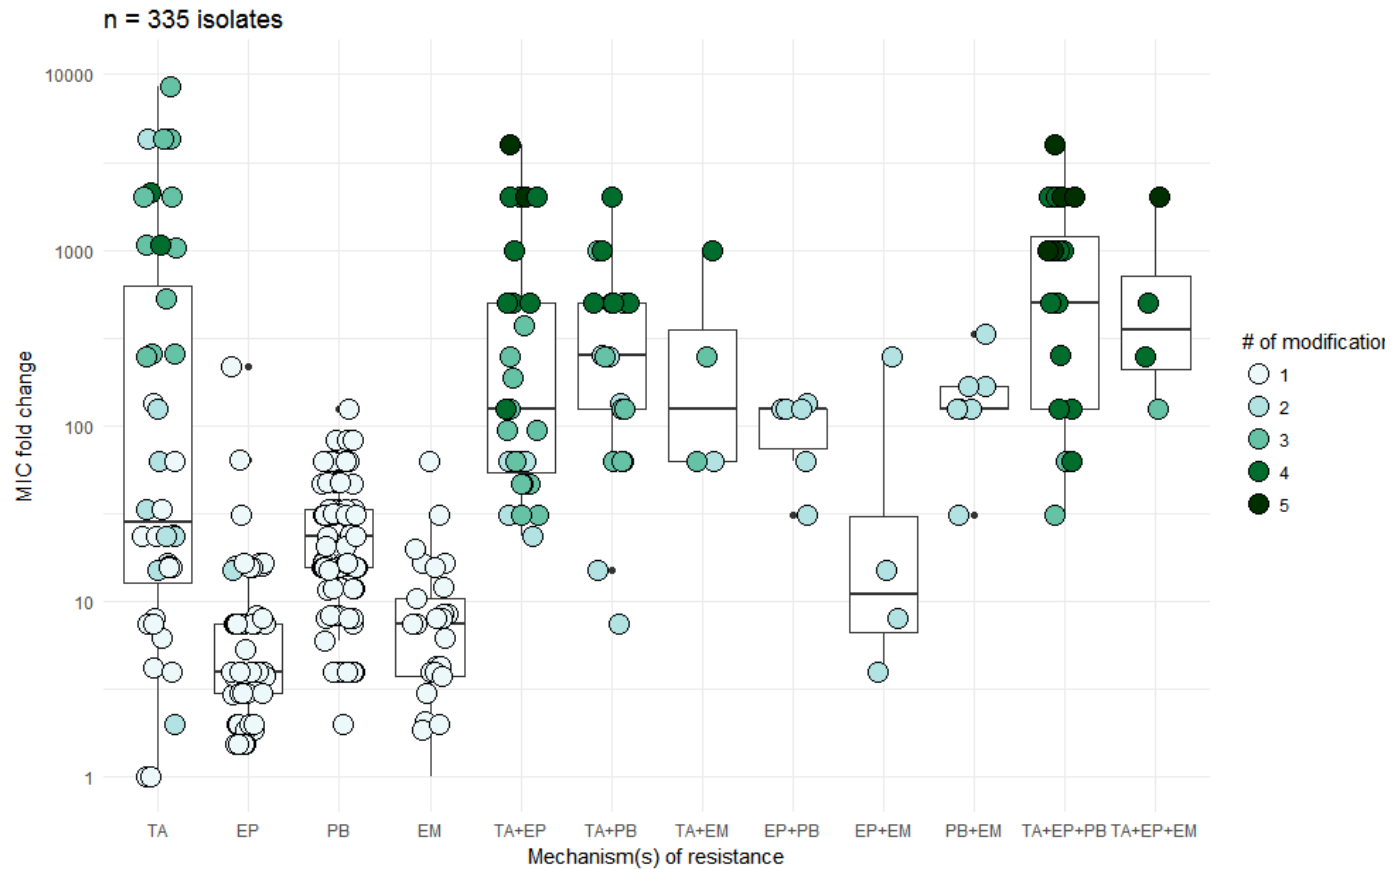

760

761 **Figure 3.** Median fold change (interquartile range) in ciprofloxacin MIC for each resistance  
762 mechanism or combination of resistance mechanisms experimentally tested in 366 isolates. Fold  
763 changes were calculated by dividing the MIC after modification by the MIC before modification  
764 for each isolate. Data points represent single *E. coli* isolates. Darker fill of data points indicates  
765 the presence of multiple resistance mutations or resistance genes in the isolate. Isolates that  
766 showed a decreased ciprofloxacin MIC after modification (such as deletion of *acrAB* or *tolC*) are  
767 not shown but are listed in table S1.<sup>30,31,57</sup> TA = target alteration (mutations in *gyrA*, *gyrB* or  
768 *parC*), EP = efflux pump (mutations in *acrB*, *marR*, *acrR*, *rpoB* or presence of *qepA* or *oqxAB*),  
769 PB = physical blocking (presence of *qnrA*, *qnrB*, *qnrC*, *qnrD*, *qnrE* or *qnrS*), EM = enzymatic  
770 modification (presence of *aac(6')Ib-cr* or *crpP*).

771

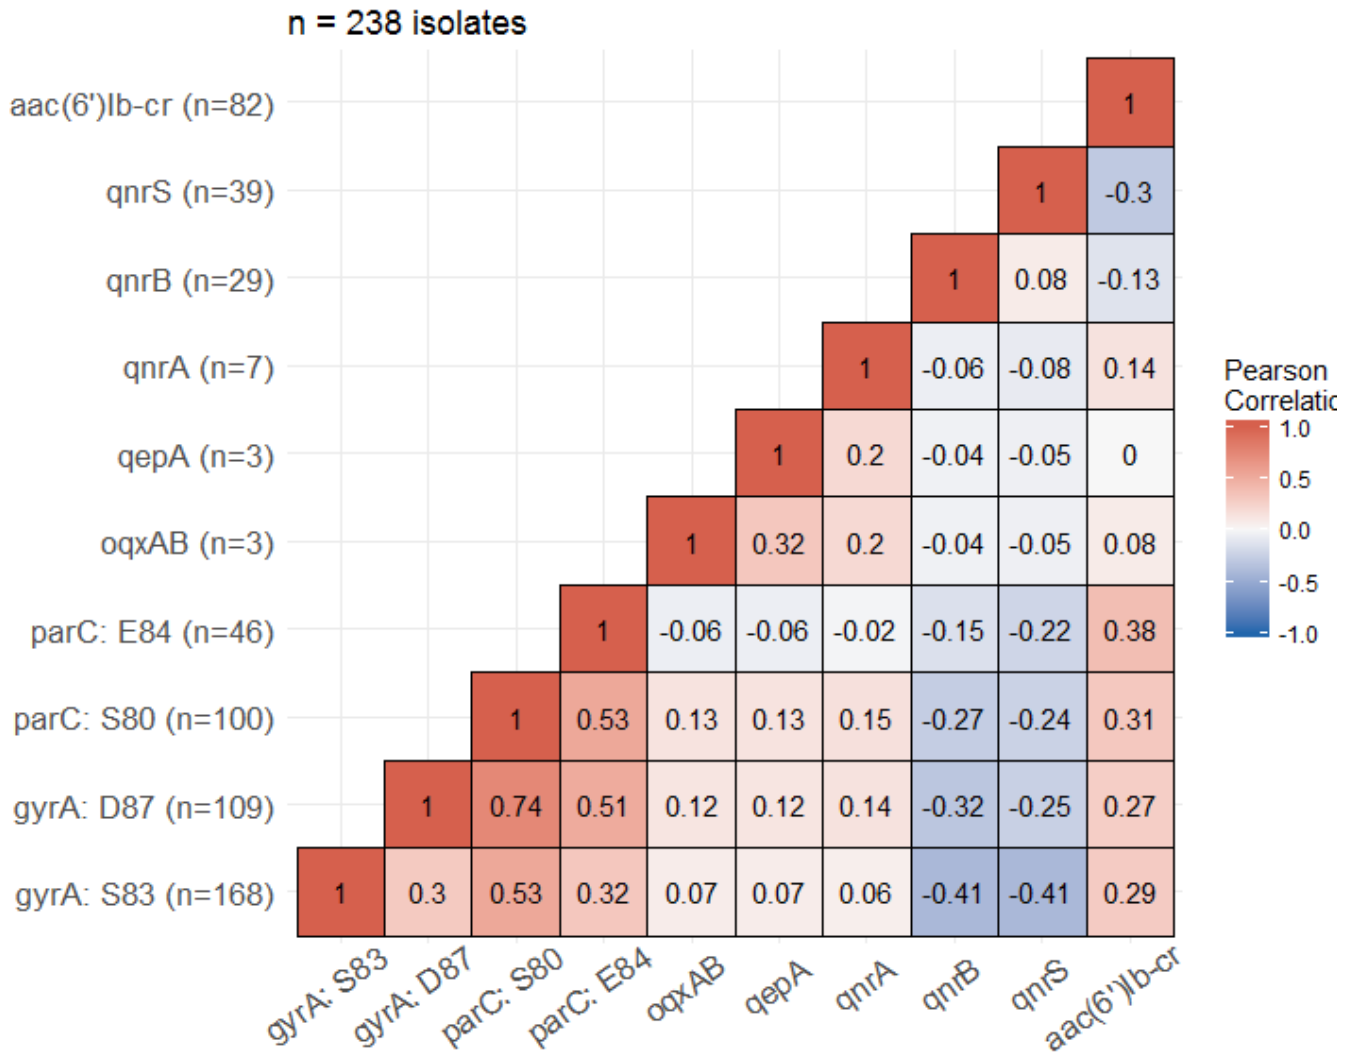

772

773 **Figure 4.** Matrix displaying Pearson correlation coefficients calculated between resistance  
 774 determinants in a pairwise manner. All 238 strains used for this analysis were screened for all  
 775 displayed resistance determinants. The reported frequencies of resistance determinants in our  
 776 dataset are displayed on the y-axis. Full data is provided in table S2.

777

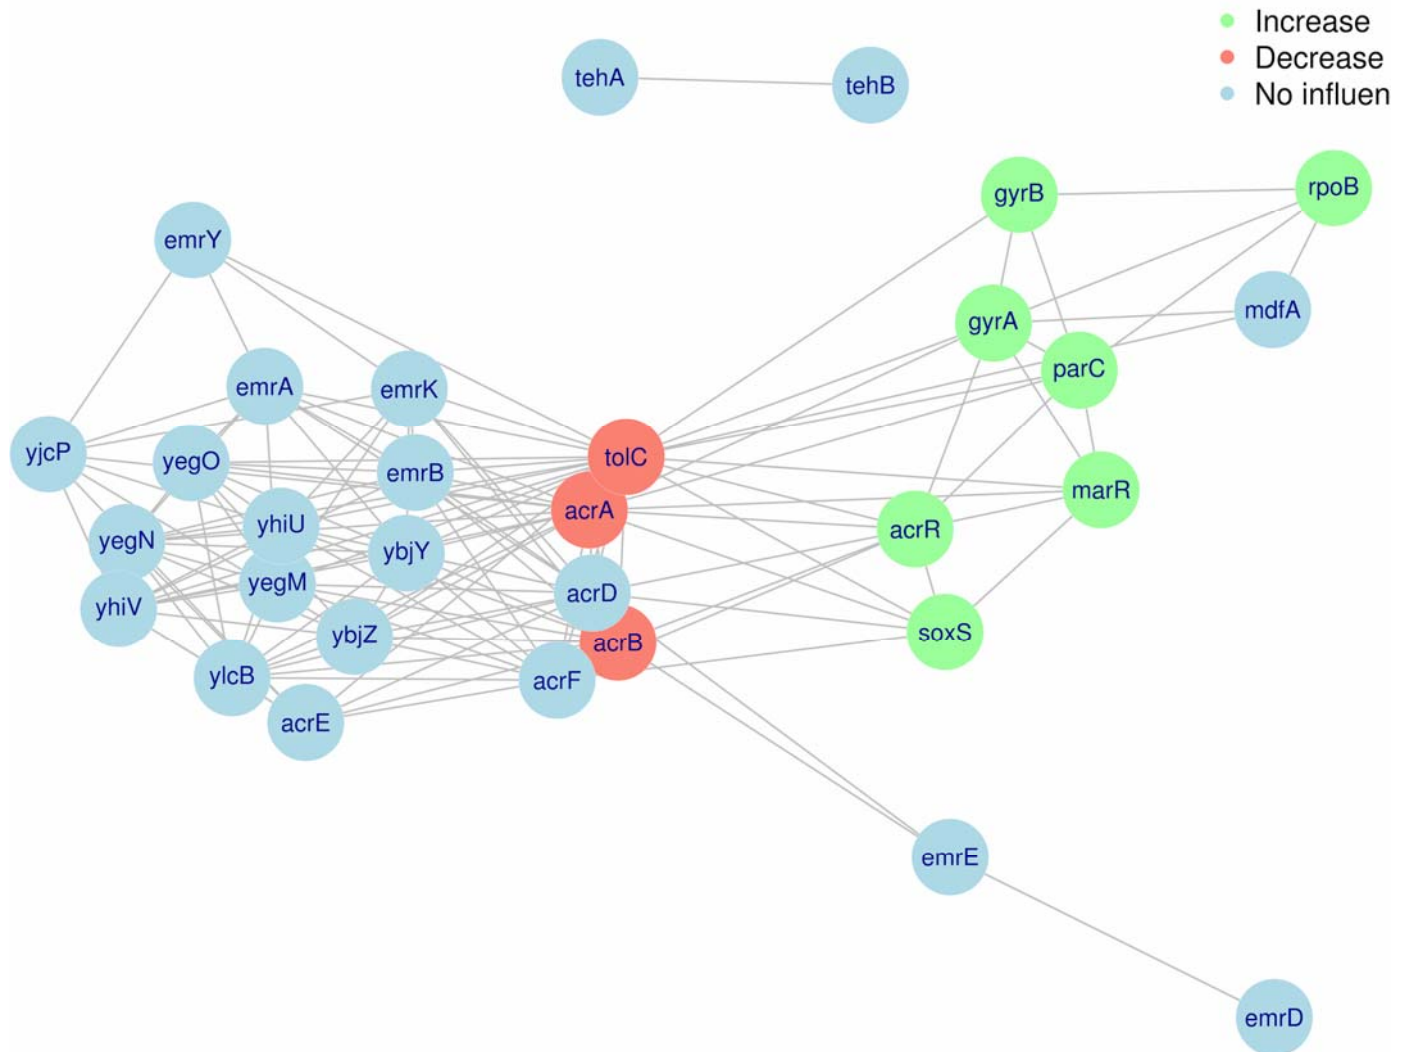

778

779 **Figure 5.** Network of *E. coli* ciprofloxacin resistance-associated chromosomal genes. 31 genes  
780 that were examined for their influence on ciprofloxacin and were present in the *E. coli* K-12  
781 MG1655 genome were mapped to the String-v10 PPI database. Genes were coloured green if a  
782 mutation conferring increased ciprofloxacin resistance was observed; genes were coloured red  
783 when a mutation decreased ciprofloxacin resistance; genes were coloured blue when a mutation  
784 showed no effect on ciprofloxacin resistance. The network is displayed by R package iGraph  
785 employing the force-directed layout algorithm by Fruchterman and Reingold. The list of edges  
786 with corresponding data categories (PI, FP or TM) is available as supplementary table 3.

787

788 **Table 1.** Ciprofloxacin resistance mechanisms in *Escherichia coli* and genes involved in these  
 789 mechanisms. Note that in this overview, only genes are displayed that were shown to have any  
 790 effect on ciprofloxacin susceptibility when mutations are present (chromosomal genes) or if the  
 791 resistance gene is present (plasmid-encoded genes).

| Resistance mechanism                      | Chromosomal genes involved in ciprofloxacin resistance                                                                                         | Plasmid-encoded genes involved in ciprofloxacin resistance                                                                                                               |
|-------------------------------------------|------------------------------------------------------------------------------------------------------------------------------------------------|--------------------------------------------------------------------------------------------------------------------------------------------------------------------------|
| Target alteration                         | <i>gyrA</i> <sup>12</sup> , <i>gyrB</i> <sup>29</sup> , <i>parC</i> <sup>11</sup>                                                              | -                                                                                                                                                                        |
| Decreased ciprofloxacin accumulation      | <i>marR</i> <sup>30</sup> , <i>acrRAB</i> <sup>31</sup> , <i>tolC</i> <sup>31</sup> ,<br><i>soxS</i> <sup>32</sup> , <i>rpoB</i> <sup>33</sup> | <i>qepA</i> <sup>34</sup> , <i>oqxAB</i> <sup>35</sup>                                                                                                                   |
| Physical blocking of ciprofloxacin target | -                                                                                                                                              | <i>qnrA</i> <sup>36</sup> , <i>qnrB</i> <sup>37</sup> , <i>qnrC</i> <sup>38</sup> , <i>qnrD</i> <sup>39</sup> ,<br><i>qnrE</i> <sup>40</sup> , <i>qnrS</i> <sup>41</sup> |
| Enzymatic modification of ciprofloxacin   | -                                                                                                                                              | <i>aac(6')-Ib-cr</i> <sup>42</sup><br><i>crpP</i> <sup>43</sup>                                                                                                          |

792

793

794 **Table 2.** Medians and ranges of ciprofloxacin MIC fold changes stratified by resistance  
 795 determinants. Only data from isolates harbouring resistance determinants from a single  
 796 mechanism are shown.

| Resistance determinant                                       | Median ciprofloxacin MIC fold change (range) | # of isolates | References     |
|--------------------------------------------------------------|----------------------------------------------|---------------|----------------|
| Gly81Asp ( <i>gyrA</i> )                                     | 2.6 (1-4.2)                                  | 2             | 49,56          |
| Asp82Gly ( <i>gyrA</i> )                                     | 1                                            | 1             | 49             |
| Ser83Trp ( <i>gyrA</i> )                                     | 6.3                                          | 1             | 10             |
| Ser83Leu ( <i>gyrA</i> )                                     | 23.8 (4-133.3)                               | 9             | 11,49–51,53–55 |
| Asp87Asn ( <i>gyrA</i> )                                     | 15.6 (7.5-15.6)                              | 3             | 51,54,55       |
| Gly81Asp, Asp82Gly ( <i>gyrA</i> )                           | 2                                            | 1             | 49             |
| Ser83Leu, Asp87Asn ( <i>gyrA</i> )                           | 23.8 (15-23.8)                               | 3             | 51,54,59       |
| Ser83Leu, Asp87Gly ( <i>gyrA</i> )                           | 4266.7                                       | 1             | 77             |
| Asp426Asn ( <i>gyrB</i> )                                    | 8                                            | 1             | 29             |
| Ser80Ile ( <i>parC</i> )                                     | 1                                            | 1             | 51             |
| Ser83Trp ( <i>gyrA</i> ), Gly78Asp ( <i>parC</i> )           | 33.3                                         | 1             | 11             |
| Ser83Leu ( <i>gyrA</i> ), Ser80Ile ( <i>parC</i> )           | 62.55                                        | 1             | 51             |
| Ser83Leu ( <i>gyrA</i> ), Ser80Arg ( <i>parC</i> )           | 125                                          | 1             | 53             |
| Asp87Asn ( <i>gyrA</i> ), Ser80Ile ( <i>parC</i> )           | 23.8                                         | 1             | 51             |
| Ser83Leu, Asp87Asn ( <i>gyrA</i> ), Ser80Ile ( <i>parC</i> ) | 2000 (1066.7-2000)                           | 3             | 11,51,54       |
| Ser83Leu, Asp87Gly ( <i>gyrA</i> ),                          | 1024 (256-8533.3)                            | 3             | 11             |



|                                                                           |                      |    |                   |
|---------------------------------------------------------------------------|----------------------|----|-------------------|
| Ser80Ile ( <i>parC</i> )                                                  |                      |    |                   |
| Ser83Leu, Asp87Asn ( <i>gyrA</i> ),<br>Ser80Arg ( <i>parC</i> )           | 2258.3 (250-4266.7)  | 2  | 11,59             |
| Ser83Leu, D87Y ( <i>gyrA</i> ), Ser80Ile<br>( <i>parC</i> )               | 256                  | 1  | 11                |
| Ser83Leu, Asp87Asn ( <i>gyrA</i> ),<br>Glu84Lys ( <i>parC</i> )           | 533.3                | 1  | 11                |
| Ser83Leu, Asp87Gly ( <i>gyrA</i> ),<br>Glu84Lys ( <i>parC</i> )           | 4266.7               | 1  | 11                |
| Ser83Leu, Asp87Asn ( <i>gyrA</i> ),<br>Ser80Ile, Glu84Gly ( <i>parC</i> ) | 1600 (1066.7-2133.3) | 2  | 11                |
| <i>acrB</i> : Gly228Asp                                                   | 16.7                 | 1  | 61                |
| $\Delta$ <i>acrAB</i>                                                     | 0.1 (0-0.3)          | 10 | 30,31,57          |
| $\Delta$ <i>toiC</i>                                                      | 0.3                  | 1  | 31                |
| <i>marR</i> (various mutations)                                           | 3.5 (1.5-4)          | 14 | 60                |
| $\Delta$ <i>marR</i>                                                      | 3.8 (2-218)          | 5  | 30,51,54,58,59    |
| <i>acrR</i> (various mutations)                                           | 4 (2-16)             | 6  | 78                |
| $\Delta$ <i>acrR</i>                                                      | 2.9                  | 1  | 51                |
| <i>soxS</i> : Ala12Ser                                                    | 4                    | 1  | 32                |
| <i>rpoB</i> (various mutations)                                           | 3 (1.5-3)            | 3  | 33                |
| <i>oqxAB</i>                                                              | 7.5 (2-16)           | 17 | 35,62-64          |
| <i>qepA</i>                                                               | 8.3 (1.9-64)         | 13 | 34,52,65-68,79    |
| <i>qepA</i> , $\Delta$ <i>marR</i>                                        | 15                   | 1  | 67                |
| <i>qnrA</i> (unspecified allele)                                          | 31.3 (20.8-31.7)     | 12 | 80                |
| <i>qnrA1</i>                                                              | 31 (4-66.7)          | 37 | 39,50,52,53,81-89 |

|                                  |                  |    |                                            |
|----------------------------------|------------------|----|--------------------------------------------|
| <i>qnrA3</i>                     | 31.3             | 1  | 81                                         |
| <i>qnrB1</i>                     | 12.5 (4-62.5)    | 8  | 52,53,85,87                                |
| <i>qnrB2</i>                     | 15.6 (11.8-31.3) | 4  | 81,90                                      |
| <i>qnrB4</i>                     | 15.6 (15.6-15.6) | 3  | 91                                         |
| <i>qnrB5</i>                     | 15.6 (15.6-15.6) | 2  | 72                                         |
| <i>qnrB6</i>                     | 15.6             | 1  | 72                                         |
| <i>qnrB19</i>                    | 11.9             | 1  | 82                                         |
| <i>qnrC1</i>                     | 31.3 (15-62.5)   | 3  | 59,38,85                                   |
| <i>qnrD1</i>                     | 15 (7.5-62.5)    | 3  | 59,39,85                                   |
| <i>qnrE1</i>                     | 62.5             | 1  | 40                                         |
| <i>qnrS</i> (unspecified allele) | 12.3 (2-83.3)    | 6  | 74,76                                      |
| <i>qnrS1</i>                     | 33.3 (4-125)     | 24 | 39,50,52,53,63,79,81<br>,82,85,87,90,92-94 |
| <i>qnrS2</i>                     | 15               | 1  | 95                                         |
| <i>aac(6')Ib-cr</i>              | 6.9 (1-62.5)     | 28 | 52,42,71,73-<br>76,79,94,96                |
| <i>crpP</i>                      | 7.5              | 1  | 43                                         |

797

798

799 **Table 3.** Median ciprofloxacin MICs for three resistance determinants that were reported at least  
800 five times in both experimental and observational data. The EUCAST epidemiological cut-off for  
801 ciprofloxacin resistance in *E. coli* is 0.064 mg/L.

| <b>Resistance determinant(s)</b> | <b>Median and range of ciprofloxacin MIC in experimental data (mg/L)</b> | <b>Number of isolates in experimental data</b> | <b>Median and range of ciprofloxacin MIC in observational data (mg/L)</b> | <b>Number of isolates in observational data</b> |
|----------------------------------|--------------------------------------------------------------------------|------------------------------------------------|---------------------------------------------------------------------------|-------------------------------------------------|
| Ser83Leu ( <i>gyrA</i> )         | 0.25 (0.06-0.38)                                                         | 5                                              | 0.25 (0.125-64)                                                           | 34                                              |
| <i>qnrS1</i>                     | 0.25 (0.032-1)                                                           | 16                                             | 0.2 (0.1-4)                                                               | 19                                              |
| <i>aac(6')Ib-cr</i>              | 0.06 (0.004-0.5)                                                         | 22                                             | 0.25 (0.25-0.5)                                                           | 5                                               |

802

803
